# Supplementary material for: Analysis of Mitochondrial haemoglobin in Parkinson's disease brain
Source: PubMed Central journal article supplement (PMC4940210; doi:10.1016/j.mito.2016.05.001), 2016-07

Supplementary Figure 1

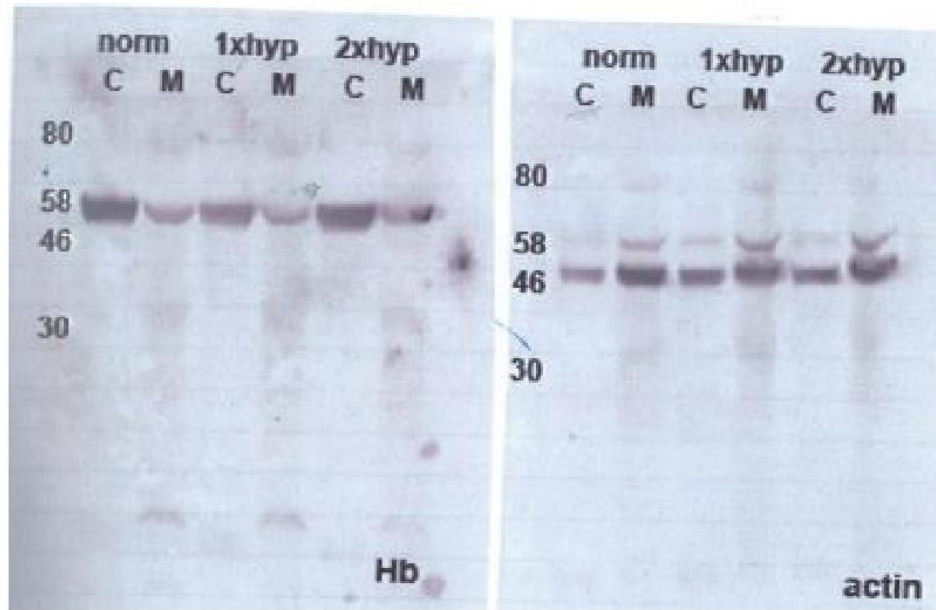

Supplement: mmc1.pdf [file mmc1.pdf]
